# Supplementary material for: Boron-doped melamine-derived carbon nitrides tailored by ionic liquids for catalytic conversion of CO2 into cyclic carbonates
Source: Royal Society of Chemistry journal article supplement (doi:10.1039/c7gc00279c), 2017-01-01
Supplement: c7gc00279c1.pdf [file c7gc00279c1.pdf]

## Electronic Supplementary Information

### Boron-doped Melamine-derived Carbon Nitrides Tailored by Ionic Liquids for Catalytic Conversion of CO<sub>2</sub> into Cyclic Carbonates

Qian Su, Xiaoqian Yao, Weiguo Cheng\* and Suojiang Zhang\*

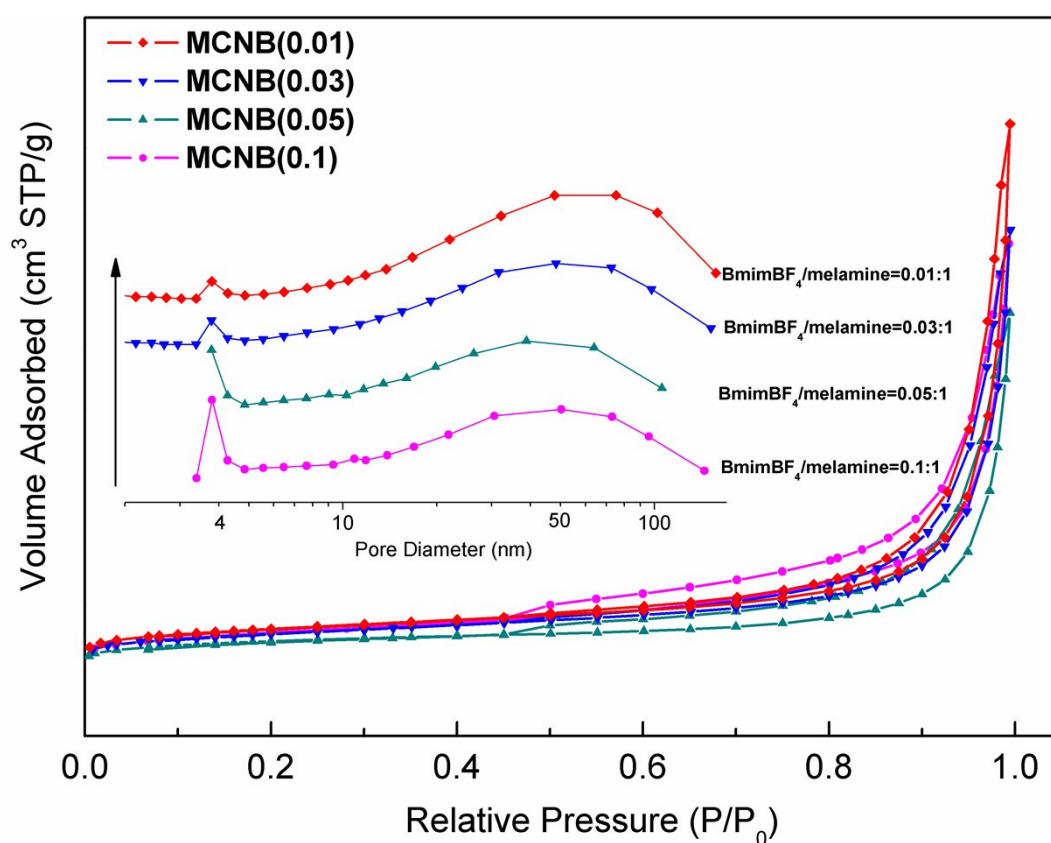

**Fig. S1** N<sub>2</sub> adsorption-desorption isotherms and pore size distribution curves of MCNB materials with different addition amounts of BmimBF<sub>4</sub>

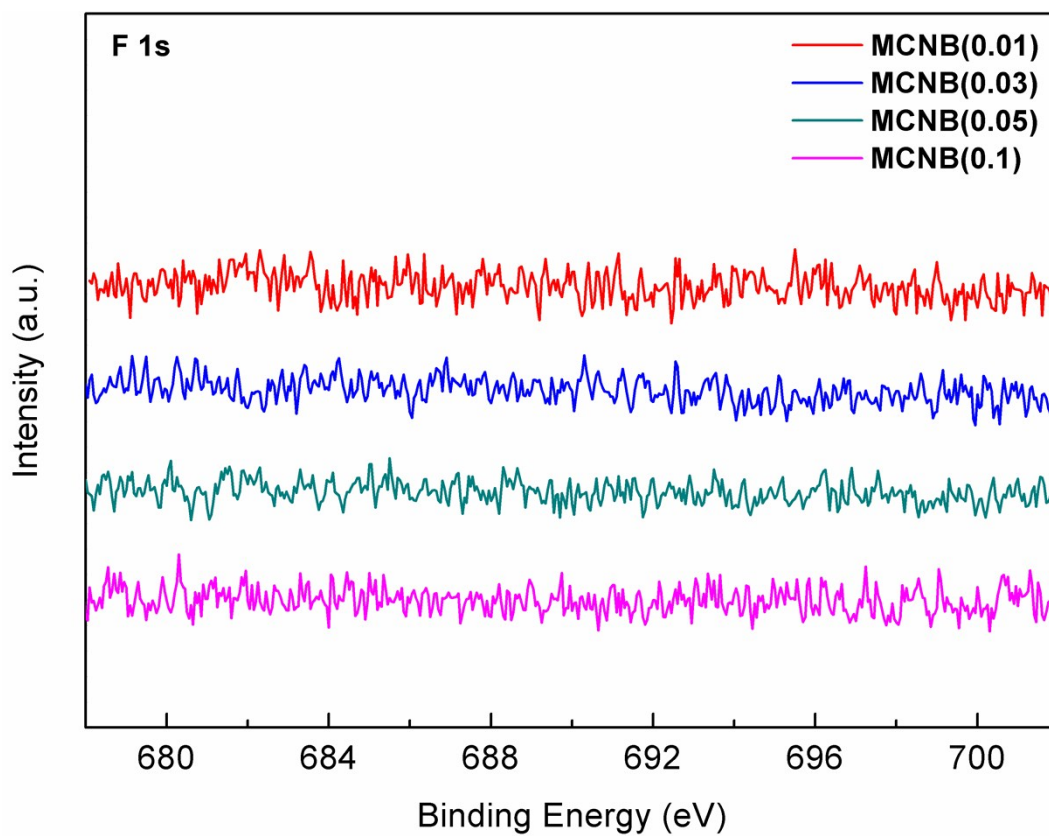

**Fig. S2** F1s spectra of as-prepared MCNB materials with different addition amounts of BmimBF<sub>4</sub>

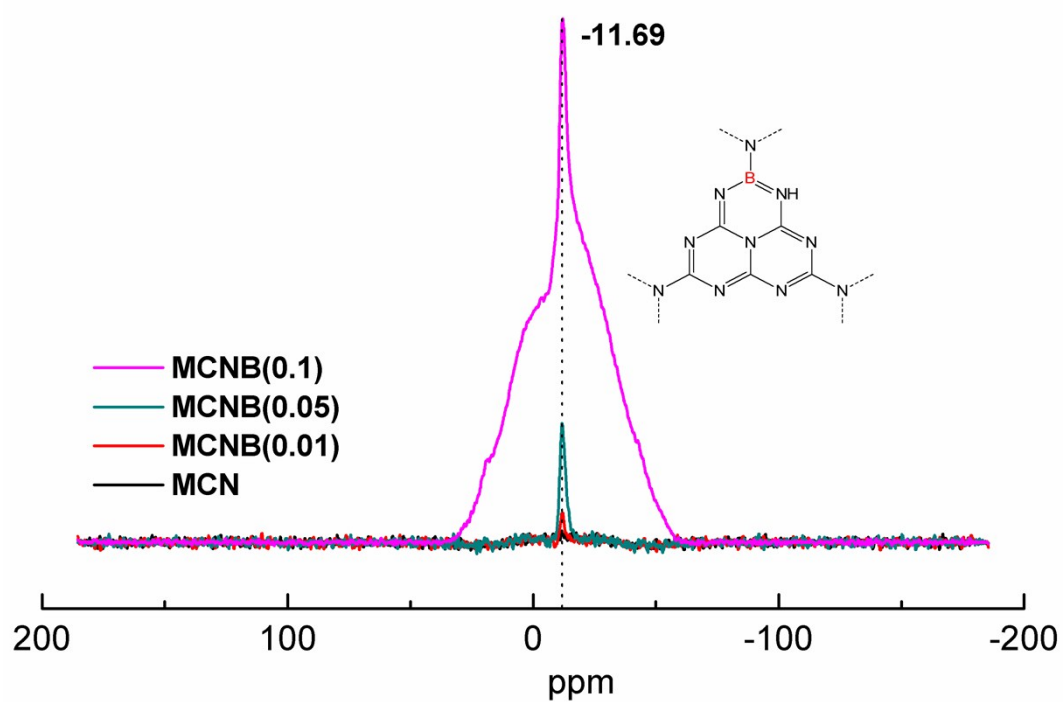

**Fig. S3** B<sup>11</sup> solid-state MAS NMR of MCNB materials with different addition amounts of BmimBF<sub>4</sub>
